# Supplementary material
Source: MDPI journal article supplement (https://www.mdpi.com/2073-4441/13/24/3618)
Supplement: s1 [file s1]

## Supplementary material

**Table S1.** Effect of ethanol on survival, distance and speed in control groups at 2 °C, and CPF= 0 ng L<sup>-1</sup> (ANOVA and Tukey HSD test).

|             | Effect    | Degree of Freedom | MS           | F            | p     |
|-------------|-----------|-------------------|--------------|--------------|-------|
| ET_Survival | 0.017     | 2                 | 0.009        | 0.187        | 0.831 |
| ET_distance | 3.08      | 2                 | 1.54         | 0.259        | 0.774 |
| ET_speed    | 0.145     | 2                 | 0.073        | 1.465        | 0.253 |
| Survival    | % ethanol | {1} (1.3758)      | {2} (1.3861) | {3} (1.3279) |       |
| 1           | 1.10E-06  |                   | 0.995        | 0.885        |       |
| 2           | 1.10E-05  | 0.995             |              | 0.836        |       |
| 3           | 1.10E-04  | 0.885             | 0.836        |              |       |
| Distance    | % ethanol | {1} (5.2953)      | {2} (6.0375) | {3} (5.9842) |       |
| 1           | 1.10E-06  |                   | 0.797        | 0.823        |       |
| 2           | 1.10E-05  | 0.797             |              | 0.999        |       |
| 3           | 1.10E-04  | 0.823             | 0.999        |              |       |
| Speed       | % ethanol | {1} (.65097)      | {2} (.72617) | {3} (.82990) |       |
| 1           | 1.10E-06  |                   | 0.757        | 0.226        |       |
| 2           | 1.10E-05  | 0.757             |              | 0.592        |       |
| 3           | 1.10E-04  | 0.226             | 0.592        |              |       |

**Table S2.** Mean (M) and Standard Error (SE) of survival (Surv, in %), distance (Dist, in mm) and speed (Speed, in mm s<sup>-1</sup>) of *Diamesa zernyi* larvae exposed at 2 °C to three ethanol concentrations (ET1=1.1E-06%, ET2= 1.1E-05%, ET3= 1.1E-04%), for 24, 48 and 72 h.

| Ethanol | Time (h) | M_Surv% | SE_Surv% | M_Dist | SE_Dist | M_Speed | SE_Speed |
|---------|----------|---------|----------|--------|---------|---------|----------|
| ET1     | 24       | 100     | 0.0      | 8.3    | 0.4     | 0.8     | 0.1      |
| ET1     | 48       | 100     | 0.0      | 9.3    | 1.8     | 0.9     | 0.2      |
| ET1     | 72       | 89      | 11.1     | 8.1    | 2.5     | 0.8     | 0.2      |
| ET2     | 24       | 100     | 0.0      | 8.3    | 2.5     | 0.7     | 0.2      |
| ET2     | 48       | 100     | 0.0      | 4.8    | 0.8     | 0.6     | 0.0      |
| ET2     | 72       | 100     | 0.0      | 5.1    | 0.7     | 0.5     | 0.1      |
| ET3     | 24       | 100     | 0.0      | 6.5    | 0.9     | 0.6     | 0.1      |
| ET3     | 48       | 100     | 0.0      | 3.7    | 0.4     | 0.8     | 0.2      |
| ET3     | 72       | 78      | 11.1     | 3.8    | 2.3     | 0.4     | 0.1      |

**Table S3.** Mean (M) and Standard Error (SE) of survival (Surv, in %), distance (Dist, in mm) and speed (Speed, in mm s<sup>-1</sup>) of *Diamesa zernyi* larvae exposed to 2, 8 and 11 °C in solution with four different chlorpyrifos concentrations (Conc= 0, 1.1, 11, 110 ng L<sup>-1</sup>), after 24, 48 and 72 h. Control with ET3 (= 1.1E-04% of ethanol) were included.

| Temp (°C) | Conc (ng L <sup>-1</sup> ) | Time (h) | M_Surv% | SE_Surv% | M_Dist | SE_Dist | M_Speed | SE_Speed |
|-----------|----------------------------|----------|---------|----------|--------|---------|---------|----------|
| 2         | 0                          | 24       | 100.0   | 0.0      | 6.5    | 0.9     | 0.6     | 0.1      |
| 2         | 0                          | 48       | 100.0   | 0.0      | 3.7    | 0.4     | 0.8     | 0.2      |
| 2         | 0                          | 72       | 77.8    | 11.1     | 3.8    | 2.3     | 0.4     | 0.1      |
| 8         | 0                          | 24       | 100.0   | 0.0      | 8.8    | 3.7     | 0.8     | 0.2      |
| 8         | 0                          | 48       | 88.9    | 11.1     | 3.3    | 0.7     | 0.8     | 0.0      |
| 8         | 0                          | 72       | 88.9    | 11.1     | 4.9    | 1.8     | 0.6     | 0.1      |
| 11        | 0                          | 24       | 100.0   | 0.0      | 10.1   | 1.3     | 1.2     | 0.2      |
| 11        | 0                          | 48       | 66.7    | 19.2     | 6.1    | 3.2     | 1.2     | 0.1      |
| 11        | 0                          | 72       | 55.6    | 22.2     | 6.7    | 2.0     | 1.1     | 0.1      |
| 2         | 1.1                        | 24       | 100.0   | 0.0      | 12.8   | 0.5     | 0.8     | 0.0      |
| 2         | 1.1                        | 48       | 100.0   | 0.0      | 7.3    | 0.5     | 0.6     | 0.0      |
| 2         | 1.1                        | 72       | 100.0   | 0.0      | 5.7    | 1.5     | 0.6     | 0.1      |
| 8         | 1.1                        | 24       | 100.0   | 0.0      | 6.8    | 1.5     | 1.3     | 0.2      |
| 8         | 1.1                        | 48       | 100.0   | 0.0      | 5.4    | 0.5     | 0.6     | 0.0      |
| 8         | 1.1                        | 72       | 88.9    | 11.1     | 5.4    | 0.4     | 0.8     | 0.1      |
| 11        | 1.1                        | 24       | 100.0   | 0.0      | 8.9    | 3.5     | 0.7     | 0.2      |
| 11        | 1.1                        | 48       | 100.0   | 0.0      | 4.2    | 1.8     | 0.5     | 0.1      |
| 11        | 1.1                        | 72       | 100.0   | 0.0      | 2.1    | 1.3     | 0.4     | 0.1      |
| 2         | 11                         | 24       | 100.0   | 0.0      | 8.1    | 2.1     | 0.6     | 0.0      |
| 2         | 11                         | 48       | 88.9    | 11.1     | 5.7    | 1.7     | 0.6     | 0.1      |
| 2         | 11                         | 72       | 44.4    | 29.4     | 4.8    | 2.7     | 0.5     | 0.2      |
| 8         | 11                         | 24       | 100.0   | 0.0      | 6.5    | 0.4     | 1.0     | 0.1      |
| 8         | 11                         | 48       | 88.9    | 11.1     | 5.7    | 1.2     | 0.8     | 0.1      |
| 8         | 11                         | 72       | 77.8    | 11.1     | 6.5    | 0.9     | 0.7     | 0.1      |
| 11        | 11                         | 24       | 100.0   | 0.0      | 11.9   | 0.9     | 1.0     | 0.1      |
| 11        | 11                         | 48       | 77.8    | 11.1     | 9.1    | 4.5     | 0.8     | 0.2      |
| 11        | 11                         | 72       | 66.7    | 0.0      | 3.2    | 1.1     | 1.0     | 0.3      |
| 2         | 110                        | 24       | 100.0   | 0.0      | 7.7    | 2.7     | 0.6     | 0.1      |
| 2         | 110                        | 48       | 88.9    | 11.1     | 5.6    | 3.0     | 0.8     | 0.2      |
| 2         | 110                        | 72       | 55.6    | 11.1     | 1.1    | 0.6     | 0.2     | 0.0      |
| 8         | 110                        | 24       | 100.0   | 0.0      | 7.6    | 0.9     | 1.0     | 0.1      |
| 8         | 110                        | 48       | 100.0   | 0.0      | 8.9    | 2.1     | 1.2     | 0.1      |
| 8         | 110                        | 72       | 100.0   | 0.0      | 6.7    | 3.1     | 0.7     | 0.1      |
| 11        | 110                        | 24       | 100.0   | 0.0      | 9.4    | 3.6     | 0.8     | 0.0      |
| 11        | 110                        | 48       | 66.7    | 19.2     | 1.1    | 0.3     | 0.4     | 0.2      |
| 11        | 110                        | 72       | 44.4    | 11.1     | 0.1    | 0.1     | 0.1     | 0.0      |
